# Supplementary material
Source: MDPI journal article supplement (https://www.mdpi.com/2227-9040/10/10/426)
Supplement: s1 [file s1]

## Supplementary Materials File

# Nanostructuring of SnO<sub>2</sub> thin films by associating glancing angle deposition and sputtering pressure for gas sensing applications

Achraf El Mohajir,<sup>a</sup> Mohammad Arab Pour Yazdi,<sup>b, c</sup> Anna Krystianiak,<sup>d</sup> Olivier Heintz,<sup>d</sup> Nicolas Martin,<sup>a</sup> Franck Berger,<sup>a</sup> and Jean-Baptiste Sanchez <sup>\*a</sup>

<sup>a</sup> Institut FEMTO-ST, UMR 6174, CNRS, Univ. Bourgogne Franche-Comté, 15B, Avenue des Montboucons, 25030 Besançon, France

<sup>b</sup> Institut FEMTO-ST, UMR 6174, CNRS, Univ. Bourgogne Franche-Comté, UTBM, Site de Montbéliard, 90010 Belfort, France

<sup>c</sup> Anton Paar TriTec SA, Les Vernets 6, 2035 Corcelles, Switzerland

<sup>d</sup> Laboratoire ICB, UMR 6303 CNRS, Univ. Bourgogne Franche-Comté, 9, Avenue Alain Savary, BP 47 870, 21078 Dijon Cedex, France

Email: [jbsanche@univ-fcomte.fr](mailto:jbsanche@univ-fcomte.fr)

\* Author to whom correspondence should be addressed.

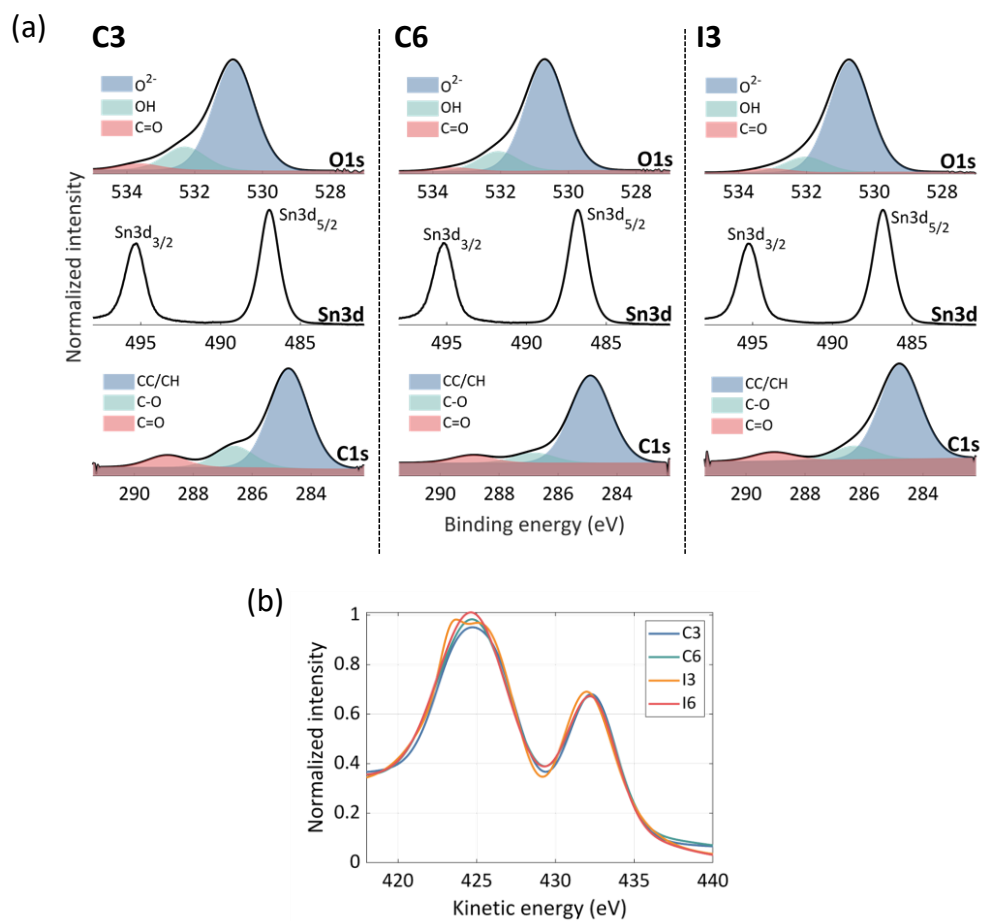

**Figure S1** (a) XPS O1s, Sn3d and C1s spectral windows of the C3, C6 and I3 SnO<sub>2</sub> thin films and (b) experimental Sn MNN Auger spectra for C3, C6, I3 and I6 SnO<sub>2</sub> thin films SnO<sub>2</sub> thin film. All films were sputter-deposited on (110) Si substrates and annealed in ambient air at 500 °C for 48 hours.

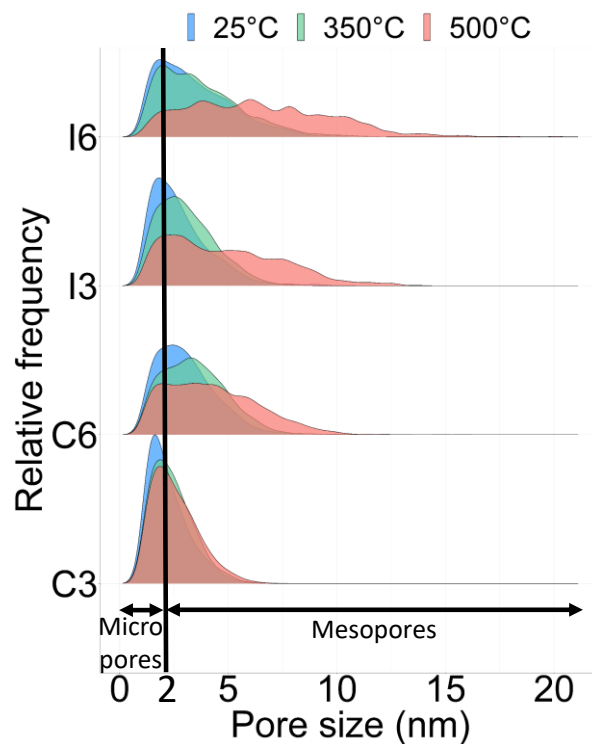

**Figure S2** Pore size distributions (PSDs) of all films sputter-deposited on (100) Si substrates, before and after annealing treatments at 350 and 500°C for 48 hours in ambient air. All PSDs were calculated using MATLAB software.

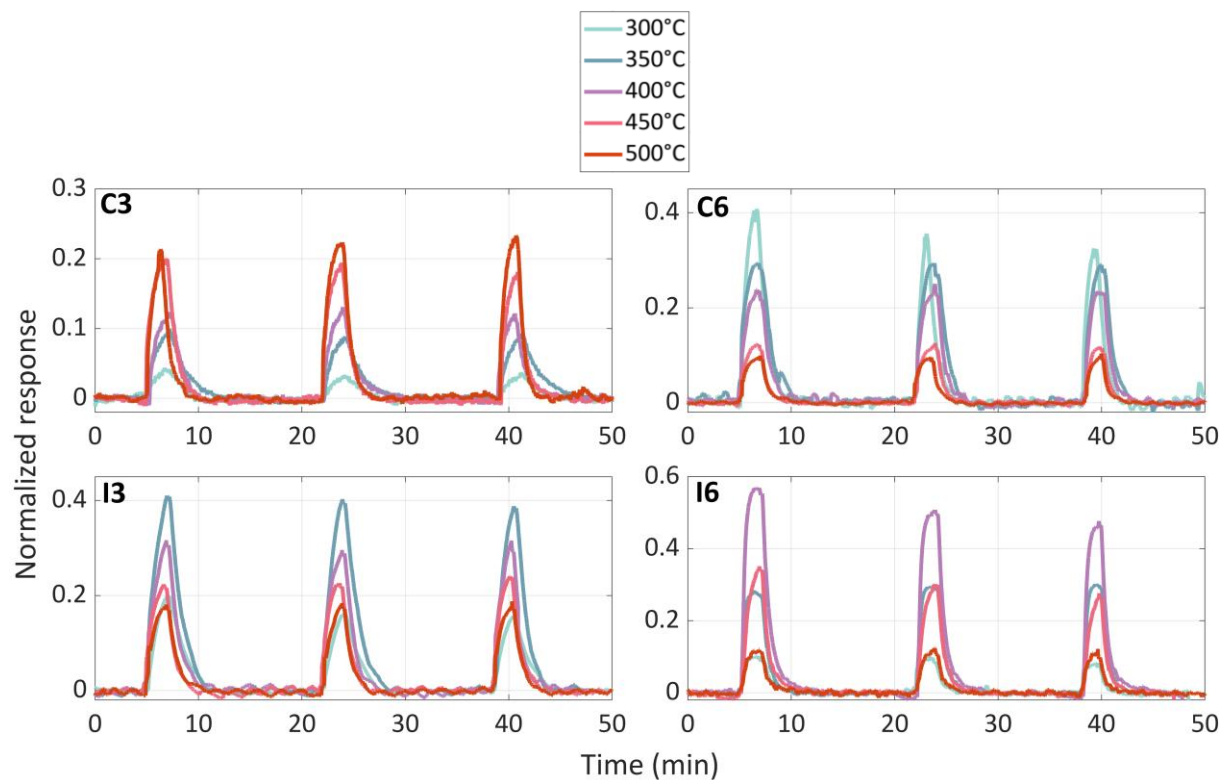

**Figure S3** Dynamic normalized response of the SnO<sub>2</sub>-based gas sensors (C3, C6, I3 and I6) as a function of the sensing temperature under 900 ppb of benzene. For all tests, 2 min. exposition time, 15 min. recovery time and 100 mL min<sup>-1</sup> flow rate were applied. Each benzene exposition was replicated 3 times.

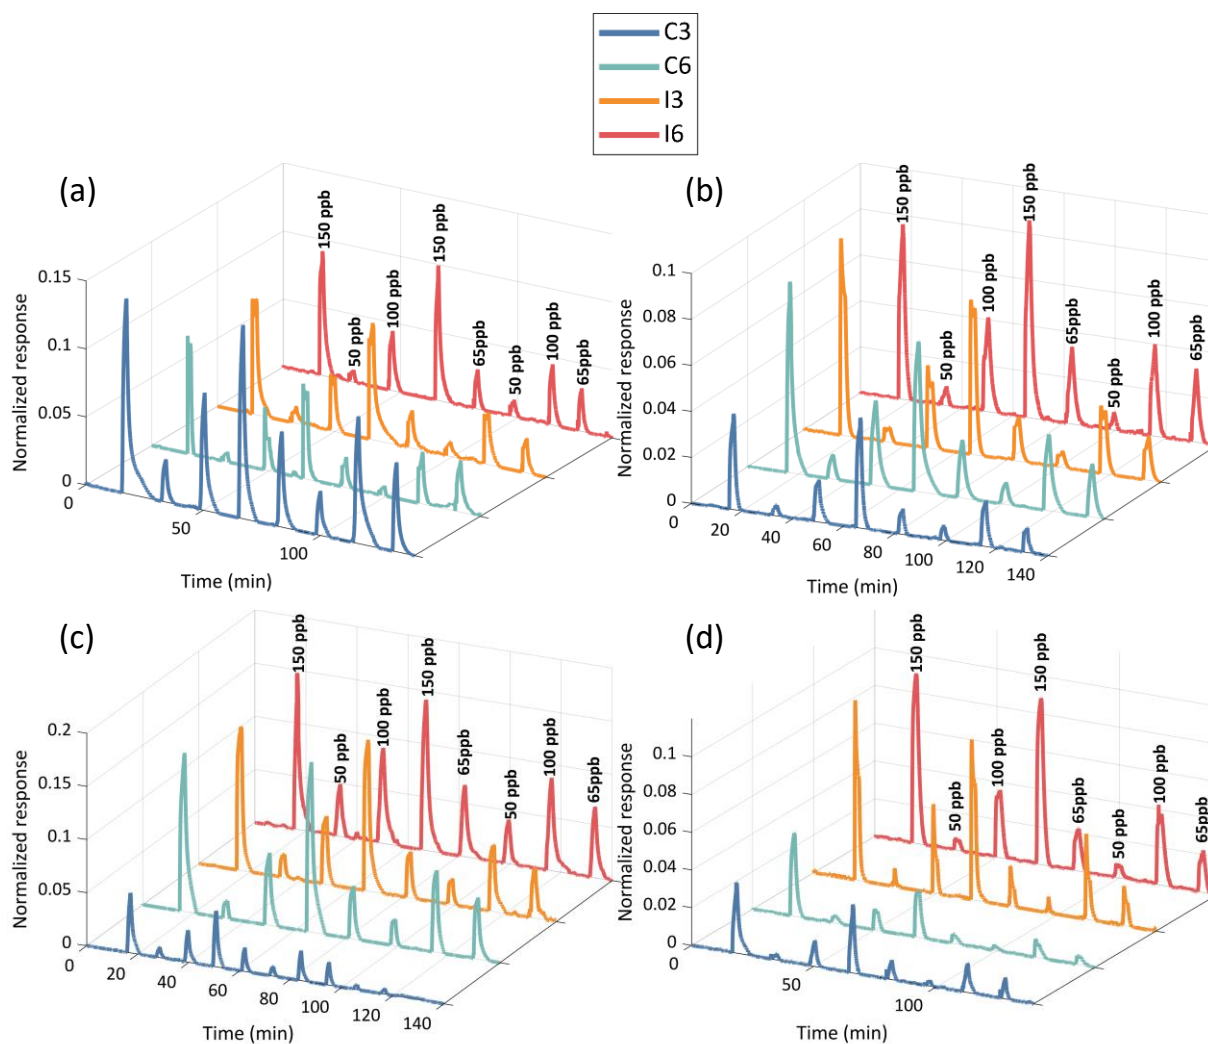

**Figure S4** Dynamic normalized response of the SnO<sub>2</sub>-based gas sensors (C3, C6, I3 and I6) for different concentrations of (a) toluene (b) ethylbenzene (c) p-xylene and (d) o-xylene. For all tests, 2 min. exposition time, 15 min. recovery time and 100 mL min<sup>-1</sup> flow rate were applied.
